# Supplementary material
Source: PubMed Central journal article supplement (PMC5838586)
Supplement: jamasurg-153-107-s001.pdf [file jamasurg-153-107-s001.pdf]

## Supplementary Online Content

Wandling MW, Nathens AB, Shapiro MB, Haut ER. Association of prehospital mode of transport with mortality in penetrating trauma: a trauma system–level assessment of private vehicle transportation vs ground emergency medical services. *JAMA Surg*. Published online September 20, 2017.  
doi:10.1001/jamasurg.2017.3601

**eTable.** Table of the 100 Most Populous Urban Trauma Systems Included in This Study.

This supplementary material has been provided by the authors to give readers additional information about their work.

**eTable. Table of the 100 most populous urban trauma systems included in this study. The most populous trauma system in this study (New York City, NY) is represented as trauma system #1, while the least populous trauma system in this study (Spokane, WA) is represented as trauma system #100.**

| Trauma System<br>(1-25)  | Trauma System<br>(26-50) | Trauma System<br>(51-75) | Trauma System<br>(76-100)    |
|--------------------------|--------------------------|--------------------------|------------------------------|
| New York City, NY        | Orlando, FL              | Rochester, NY            | Charleston, SC               |
| Los Angeles, CA          | Sacramento, CA           | Grand Rapids, MI         | Akron, OH                    |
| Chicago, IL              | Cincinnati, OH           | Tucson, AZ               | Stockton, CA                 |
| Dallas-Fort Worth, TX    | Cleveland, OH            | Honolulu, HI             | Colorado Springs, CO         |
| Houston, TX              | Kansas City, MO          | Tulsa, OK                | Syracuse, NY                 |
| Philadelphia, PA         | Las Vegas, NV            | Fresno, CA               | Cape Coral-Fort Myers, FL    |
| Washington DC            | Columbus, OH             | Bridgeport, CT           | Winston-Salem, NC            |
| Miami, FL                | Indianapolis, IN         | Worcester, MA            | Boise City, ID               |
| Atlanta, GA              | San Jose, CA             | Albuquerque, NM          | Wichita, KS                  |
| Boston, MA               | Austin, TX               | Omaha, NE                | Madison, WI                  |
| San Francisco, CA        | Nashville, TN            | Albany, NY               | Springfield, MA              |
| Phoenix, AZ              | Virginia Beach, VA       | Bakersfield, CA          | Lakeland, FL                 |
| Riverside, CA            | Providence, RI           | New Haven, CT            | Ogden, UT                    |
| Detroit, MI              | Milwaukee, WI            | Knoxville, TN            | Toledo, OH                   |
| Seattle, WA              | Jacksonville, FL         | Greenville, SC           | Deltona-Daytona Beach,<br>FL |
| Minneapolis-St. Paul, MN | Memphis, TN              | Oxnard, CA               | Des Moines, IA               |
| San Diego, CA            | Oklahoma City, OK        | El Paso, TX              | Augusta, GA                  |
| Tampa, FL                | Louisville, KY           | Allentown, PA            | Jacksonville, MS             |
| St. Louis, MO            | Richmond, VA             | Baton Rouge, LA          | Provo, UT                    |
| Baltimore, MD            | New Orleans, LA          | McAllen, TX              | Scranton, PA                 |
| Denver, CO               | Hartford, CT             | Dayton, OH               | Harrisburg, PA               |
| Pittsburgh, PA           | Raleigh, NC              | Columbia, SC             | Youngstown, OH               |
| Charlotte, NC            | Salt Lake City, UT       | Greensboro, NC           | Palm Bay-Melbourne, FL       |
| Portland, OR             | Birmingham, AL           | North Port- Sarasota, FL | Chattanooga, TN              |
| San Antonio, TX          | Buffalo, NY              | Little Rock, AR          | Spokane, WA                  |
